# Supplementary material for: Seroprevalence of Hepatitis E Virus in Moose (Alces alces), Reindeer (Rangifer tarandus), Red Deer (Cervus elaphus), Roe Deer (Capreolus capreolus), and Muskoxen (Ovibos moschatus) from Norway
Source: MDPI journal article supplement (doi:10.3390/v13020224), 2021-02-01
Supplement: s1 [file s1]

## Supplementary Material

**Table S1.** Seroprevalence of hepatitis E virus and statistical results in the tested reindeer (*Rangifer tarandus*) from Norway according to season age (adult, juvenile), sex (male, female), county of origin (Agder, Innlandet, Vestfold, Vestland, Viken) and season (spring, summer, autumn, winter).

|                          | Age <sup>1</sup> 21 |            | Sex <sup>1</sup> 8 |           | County <sup>1</sup> 61 |           |           |          |            | Season <sup>1</sup> 2 |            |        |           |
|--------------------------|---------------------|------------|--------------------|-----------|------------------------|-----------|-----------|----------|------------|-----------------------|------------|--------|-----------|
|                          | Adult               | Juvenile   | Male               | Female    | Agder                  | Innlandet | Vestfold  | Vestland | Viken      | Spring                | Summer     | Autumn | Winter    |
| N                        | 139                 | 26         | 28                 | 150       | 41                     | 50        | 9         | 60       | 6          | 61                    | 7          | 0.0    | 116       |
| Prevalence %             | 25.0                | 12.0       | 25.0               | 24.0      | 20.0                   | 24.0      | 33.0      | 20.0     | 17.0       | 20.0                  | 29.0       | 0.0    | 25.0      |
| 95% CI                   | 18.0–32.0           | –16.0–25.0 | 7.9–42             | 17.0–31.0 | 6.8–32.0               | 12–36.0   | –5.1–72.0 | 9.6–30.0 | –26.0–60.0 | 9.4–30                | –17.0–74.0 | 0.0    | 17.0–33.0 |
| p-value                  | 0.13                |            | 0.91               |           |                        |           | 0.88      |          |            | 0.69                  |            | -      |           |
| Statistic value          |                     |            |                    |           |                        |           |           |          |            |                       |            |        |           |
| K or U *as corresponding | 1561                |            | 2079               |           |                        |           | 1173      |          |            |                       |            | 0.74   |           |

<sup>1</sup> Number of animals not- analyzed for this variable.

**Table S2.** Seroprevalence of hepatitis E virus and statistical results in the tested moose (*Alces alces*) from Norway according to season age (adult, subadult, calf), sex (male, female), county of origin (Agder, Innlandet, Nordland, Oslo, Rogland, Troms og Finnmark, Trøndelag, Vestfold, Viken) and season (spring, summer, autumn, winter).

|                                        | Age <sup>1</sup> 6 |          |        | Sex <sup>1</sup> 7 |         | County <sup>1</sup> 4 |           |          |         |          |       |           | Season <sup>1</sup> 5 |       |        |         |         |        |
|----------------------------------------|--------------------|----------|--------|--------------------|---------|-----------------------|-----------|----------|---------|----------|-------|-----------|-----------------------|-------|--------|---------|---------|--------|
|                                        | Adult              | Juvenile | Calf   | Male               | Female  | Agder                 | Innlandet | Nordland | Oslo    | Rogaland | Troms | Trøndelag | Vestfold              | Viken | Spring | Summer  | Autumn  | Winter |
| N                                      | 100                | 26       | 32     | 56                 | 101     | 4                     | 34        | 21       | 1       | 1        | 11    | 33        | 12                    | 47    | 7      | 1       | 61      | 90     |
| Prevalence %                           | 26.0               | 7.7      | 13.0   | 23.0               | 19.0    | 25.0                  | 26.0      | 4.8      | 100     | 0.0      | 9.1   | 12.0      | 17.0                  | 28.0  | 14.0   | 0.0     | 21.0    | 18.0   |
| 95% CI                                 | 17.0–35            | –3.3–19  | 0.4–25 | 12.0–35            | 11.0–27 | –55–100               | 11–42     | –5.2–15  | 0.0–0.0 | 0.0–0.0  | –0.11 | 0.4–24    | –8.1–41               | 14–41 | –21–49 | 0.0–0.0 | 11.0–32 | 9.7–26 |
| <i>p</i> -value                        |                    | 0.06     |        |                    | 0.5     |                       |           |          |         | 0.1      |       |           |                       |       |        |         | 0.9     |        |
| Statistic value                        |                    |          |        |                    |         |                       |           |          |         |          |       |           |                       |       |        |         |         |        |
| <i>K</i> or <i>U</i> *as corresponding |                    | 5.7      |        |                    | 2704    |                       |           |          |         | 12.3     |       |           |                       |       |        |         | 0.6     |        |

<sup>1</sup> Number of animals not- analyzed for this variable.

**Table S3.** Seroprevalence of hepatitis E virus and statistical results in the tested muskoxen (*Ovibos moschatus*) from Norway according to season age (adult, subadult, calf), sex (male, female), and season (spring, summer, autumn, winter). All the animals were sampled in the Dovrefjell National Park.

|                                        | Age <sup>10</sup> |          |         | Sex <sup>19</sup> |        | Season <sup>143</sup> |         |         |         |
|----------------------------------------|-------------------|----------|---------|-------------------|--------|-----------------------|---------|---------|---------|
|                                        | Adult             | Juvenile | Calf    | Male              | Female | Spring                | Summer  | Autumn  | Winter  |
| N                                      | 65                | 13       | 24      | 47                | 46     | 39                    | 10      | 1       | 9       |
| Prevalence %                           | 7.7               | 7.7      | 0.0     | 4.3               | 8.7    | 10.0                  | 0.0     | 0.0     | 0.0     |
| 95% CI                                 | 1.0–14            | –9.1–24  | 0.0–0.0 | –1.7–10           | 0.2–17 | 0.3–20                | 0.0–0.0 | 0.0–0.0 | 0.0–0.0 |
| <i>p</i> -value                        |                   | 0.38     |         |                   | 0.39   |                       |         | 0.54    |         |
| Statistic value                        |                   | 1.94     |         |                   | 1033   |                       |         | 2.1     |         |
| <i>K</i> or <i>U</i> *as corresponding |                   |          |         |                   |        |                       |         |         |         |

<sup>1</sup> Number of animals not- analyzed for this variable.

**Table S4.** Seroprevalence of hepatitis E virus and statistical results in the tested red deer (*Cervus elaphus*) from Norway according to season age (adult, subadult, calf), sex (male, female), county of origin (Agder, Innlandet, Møre og Romsdal, Rogland, Trøndelag, Vestfold, Vestland, Viken) and season (spring, summer, autumn, winter).

|                                        | Age <sup>102</sup> |          |         | Sex <sup>147</sup> |          | County <sup>10</sup> |           |                 |         |           |          |          |         | Season <sup>12</sup> |        |        |         |
|----------------------------------------|--------------------|----------|---------|--------------------|----------|----------------------|-----------|-----------------|---------|-----------|----------|----------|---------|----------------------|--------|--------|---------|
|                                        | Adult              | Juvenile | Calf    | Male               | Female   | Agder                | Innlandet | Møre og Romsdal | Rogland | Trøndelag | Vestfold | Vestland | Viken   | Spring               | Summer | Autumn | Winter  |
| N                                      | 50                 | 9        | 16      | 62                 | 68       | 15                   | 16        | 20              | 17      | 33        | 11       | 44       | 21      | 31                   | 12     | 19     | 113     |
| Prevalence %                           | 6                  | 0.0      | 0.0     | 4.8                | 2.9      | 0                    | 13.0      | 10.0            | 5.9     | 6.1       | 0.0      | 0.0      | 0.0     | 0.0                  | 8.3    | 5.3    | 4.4     |
| 95% CI                                 | –0.8–13            | 0.0–0.0  | 0.0–0.0 | –0.6–10            | –1.2–7.1 | 0.0–0.0              | –5.7–31   | –4.4–24         | –6.6–18 | –2.5–15   | 0.0–0.0  | 0.0–0.0  | 0.0–0.0 | 0.0–0.0              | –0.10  | –5.8–6 | 0.6–8.3 |
| <i>p</i> -value                        |                    | 0.46     |         |                    | 0.58     |                      |           |                 |         | 0.24      |          |          |         |                      |        | 0.57   |         |
| Statistic value                        |                    | 1.5      |         |                    | 2068     |                      |           |                 |         | 9.24      |          |          |         |                      |        | 2.0    |         |
| <i>K</i> or <i>U</i> *as corresponding |                    |          |         |                    |          |                      |           |                 |         |           |          |          |         |                      |        |        |         |

<sup>1</sup>Number of animals not- analyzed for this variable.

**Table S5.** Seroprevalence of hepatitis E virus and statistical results in the tested ungulate species from Norway according to season (spring, summer, autumn, winter) and county of origin (Agder, Innlandet, Møre og Romsdal, Nordland, Oslo, Rogland, Troms og Finnmark, Trondelag, Vestfold, Vestland, Viken).

|                          | Season |           |          |         | County   |           |                 |          |         |           |                   |           |          |          |          |
|--------------------------|--------|-----------|----------|---------|----------|-----------|-----------------|----------|---------|-----------|-------------------|-----------|----------|----------|----------|
|                          | Spring | Summer    | Autumn   | Winter  | Agder    | Innlandet | Møre og Romsdal | Nordland | Oslo    | Rogland   | Troms og Finnmark | Trondelag | Vestfold | Vestland | Viken    |
| N                        | 137    | 53        | 145      | 331     | 69       | 158       | 29              | 37       | 1       | 18        | 11                | 116       | 41       | 104      | 94       |
| Prevalence               | 12.0   | 5.7       | 9.7      | 15.0    | 13.0     | 17.0      | 6.9             | 2.7      | 100     | 5.6       | 9.1               | 6.0       | 12.0     | 12.0     | 15.0     |
| 95% CI                   | 6.8–18 | –0.7–12.0 | 4.8–15.0 | 11–19.0 | 4.9–21.2 | 11.0–23.0 | –2.9–17.0       | –2.8–8.2 | 0.0–0.0 | –6.2–17.0 | –11.0–29.0        | 1.6–10.0  | 1.7–23.0 | 5.3–18.0 | 7.6–22.0 |
| <i>p</i> -value          |        | 0.13      |          |         |          |           |                 |          |         |           | 0.15              |           |          |          |          |
| Statistic value <i>K</i> |        | 5.7       |          |         |          |           |                 |          |         |           | 13.4              |           |          |          |          |

A

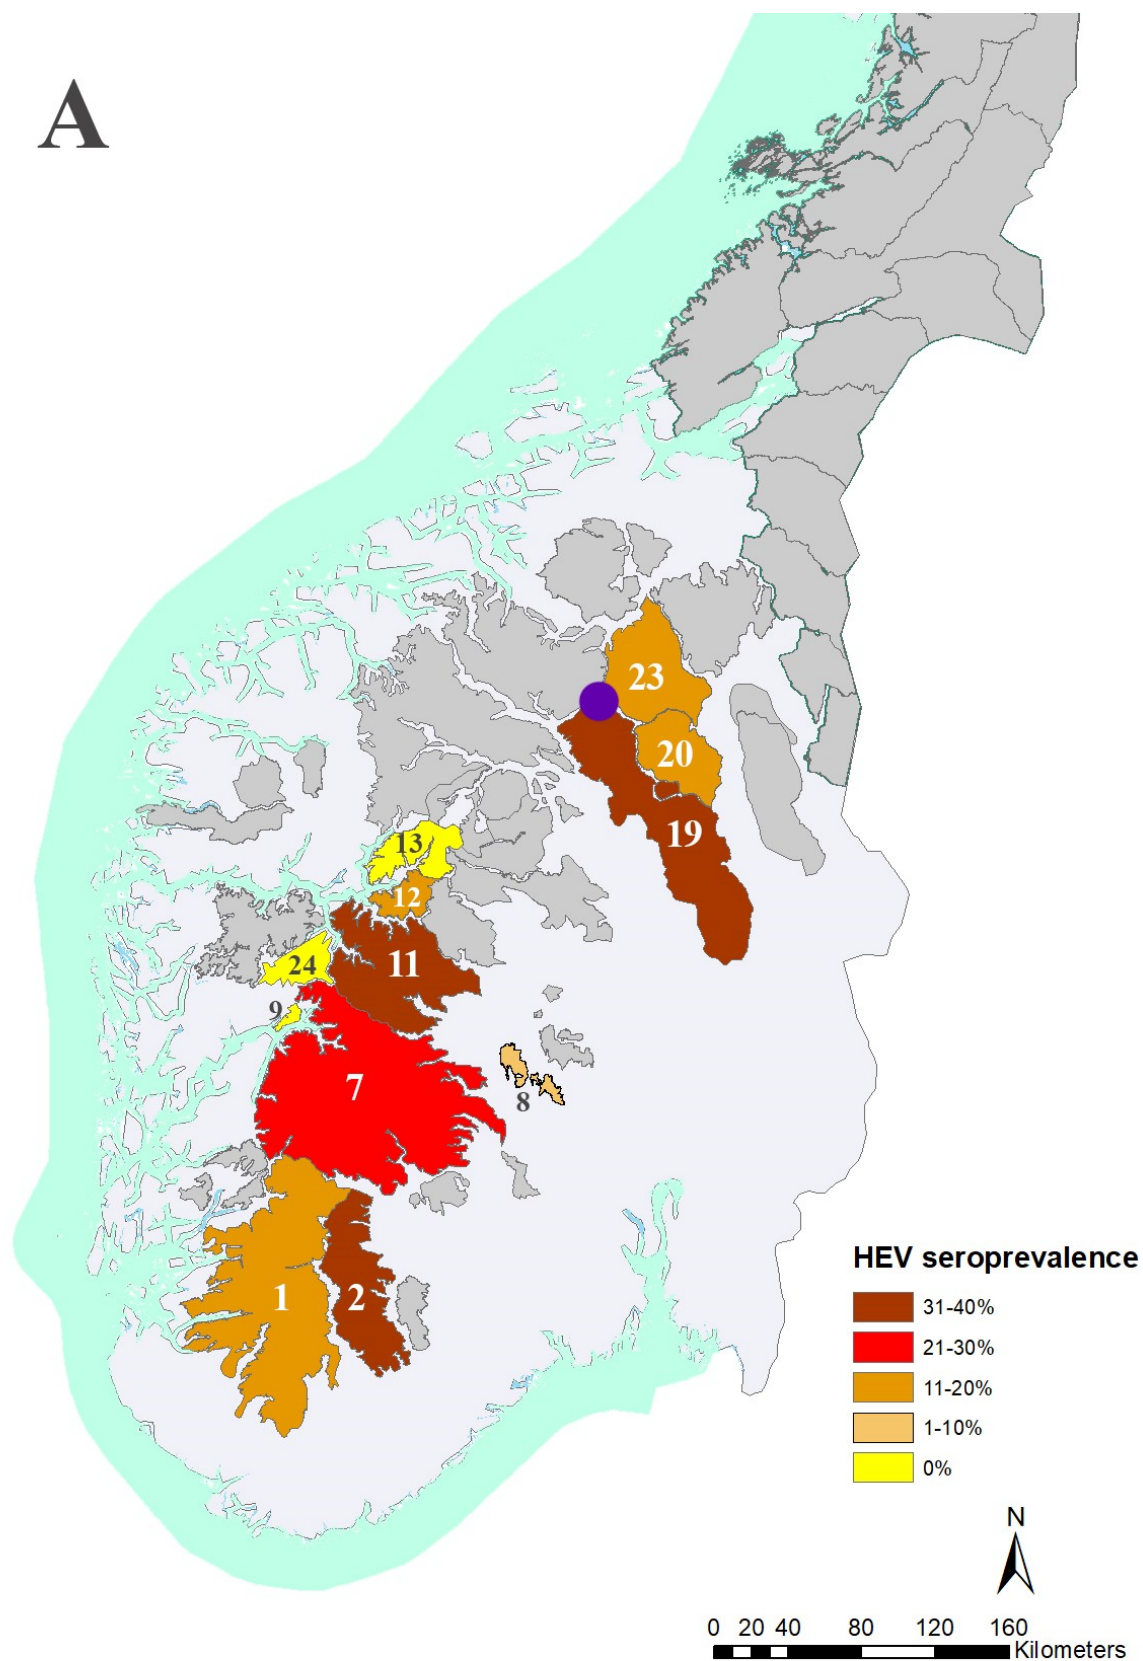

**B**

**HEV seroprevalence**

- 76-100%
- 51-75%
- 26-50%
- 0-25%
- 0,0%

Map labels include: Båtsfjord, Vefsn, Væga, Nærøysund, Høylandet, Lierne, Verdal, Meråker, Selbu, Stor-Elvdal, Trysil, Vågå, Al, Gol, Eidsvoll, Nesbyen, Nannestad, Ullensaker, Oslo, Nes, Eidskog, Aurskog-Høland, Vestby, Halden, Larvik, Birkenes, Vindafjord, and Hol.

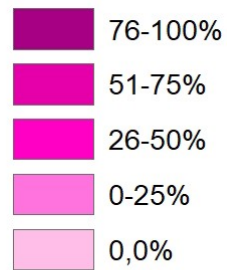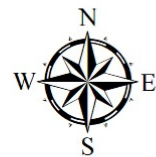

0      100      200      400 Kilometers

C

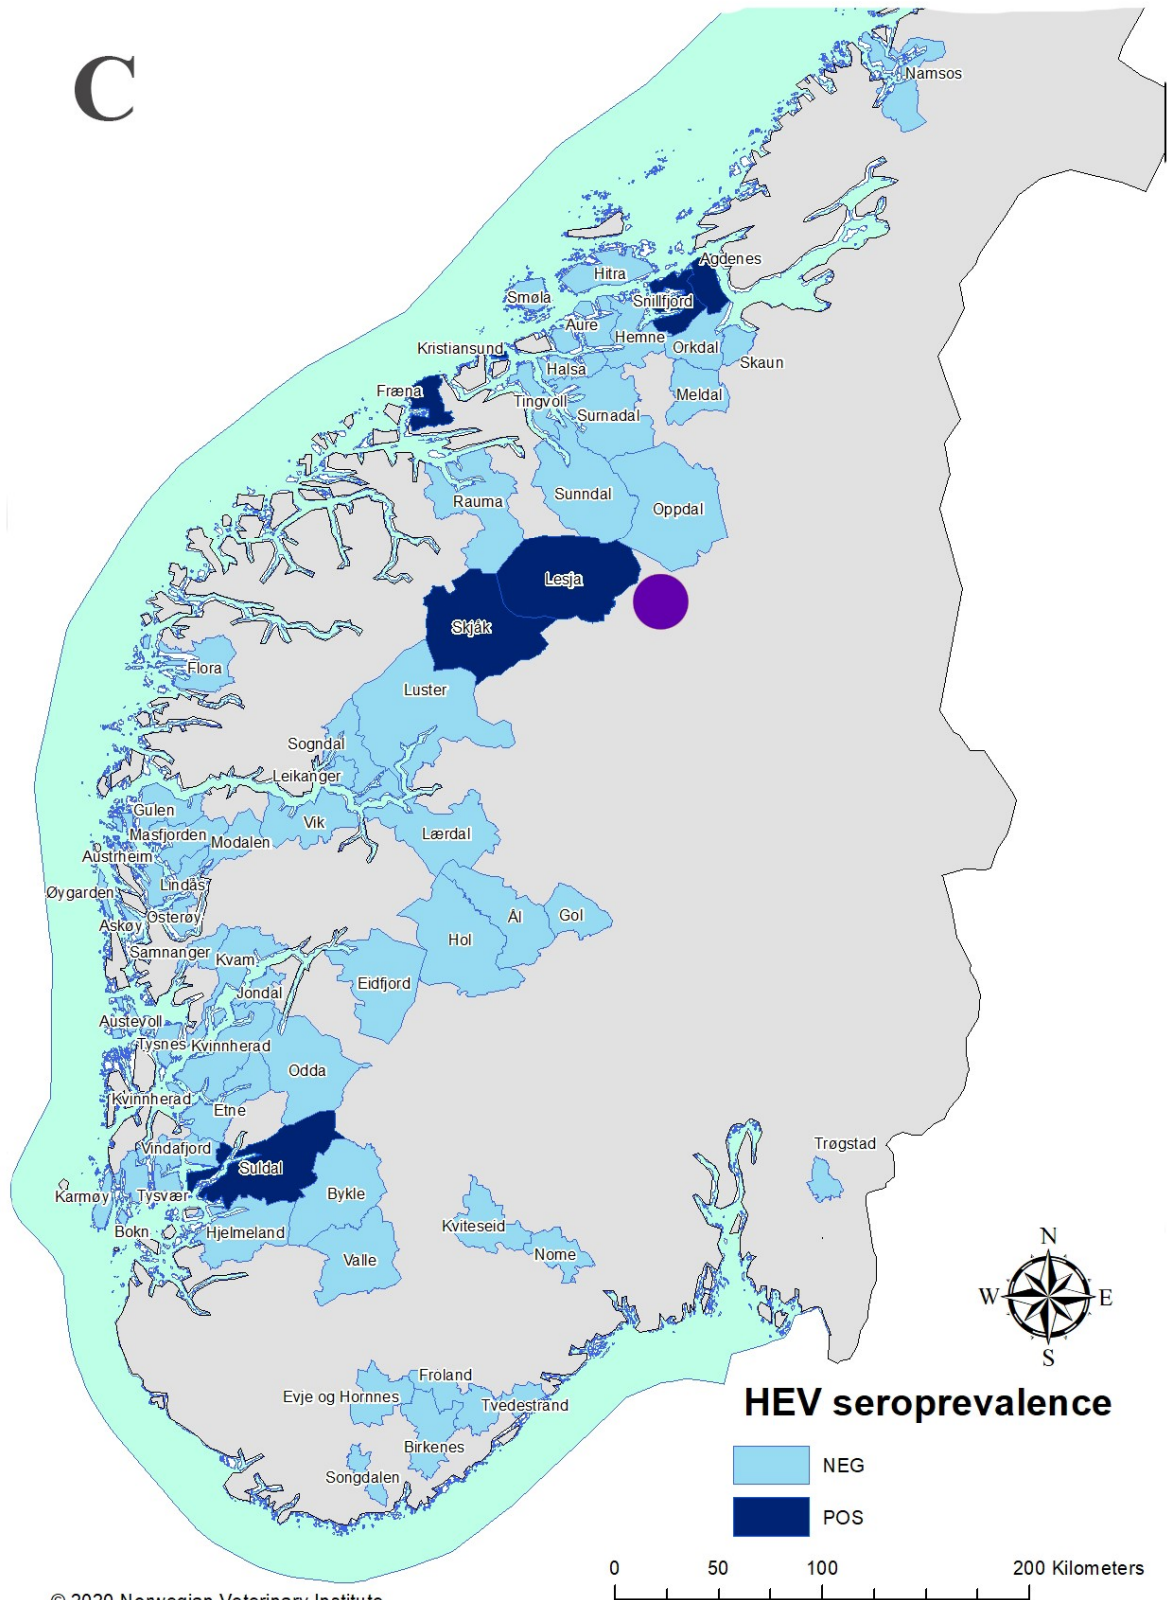



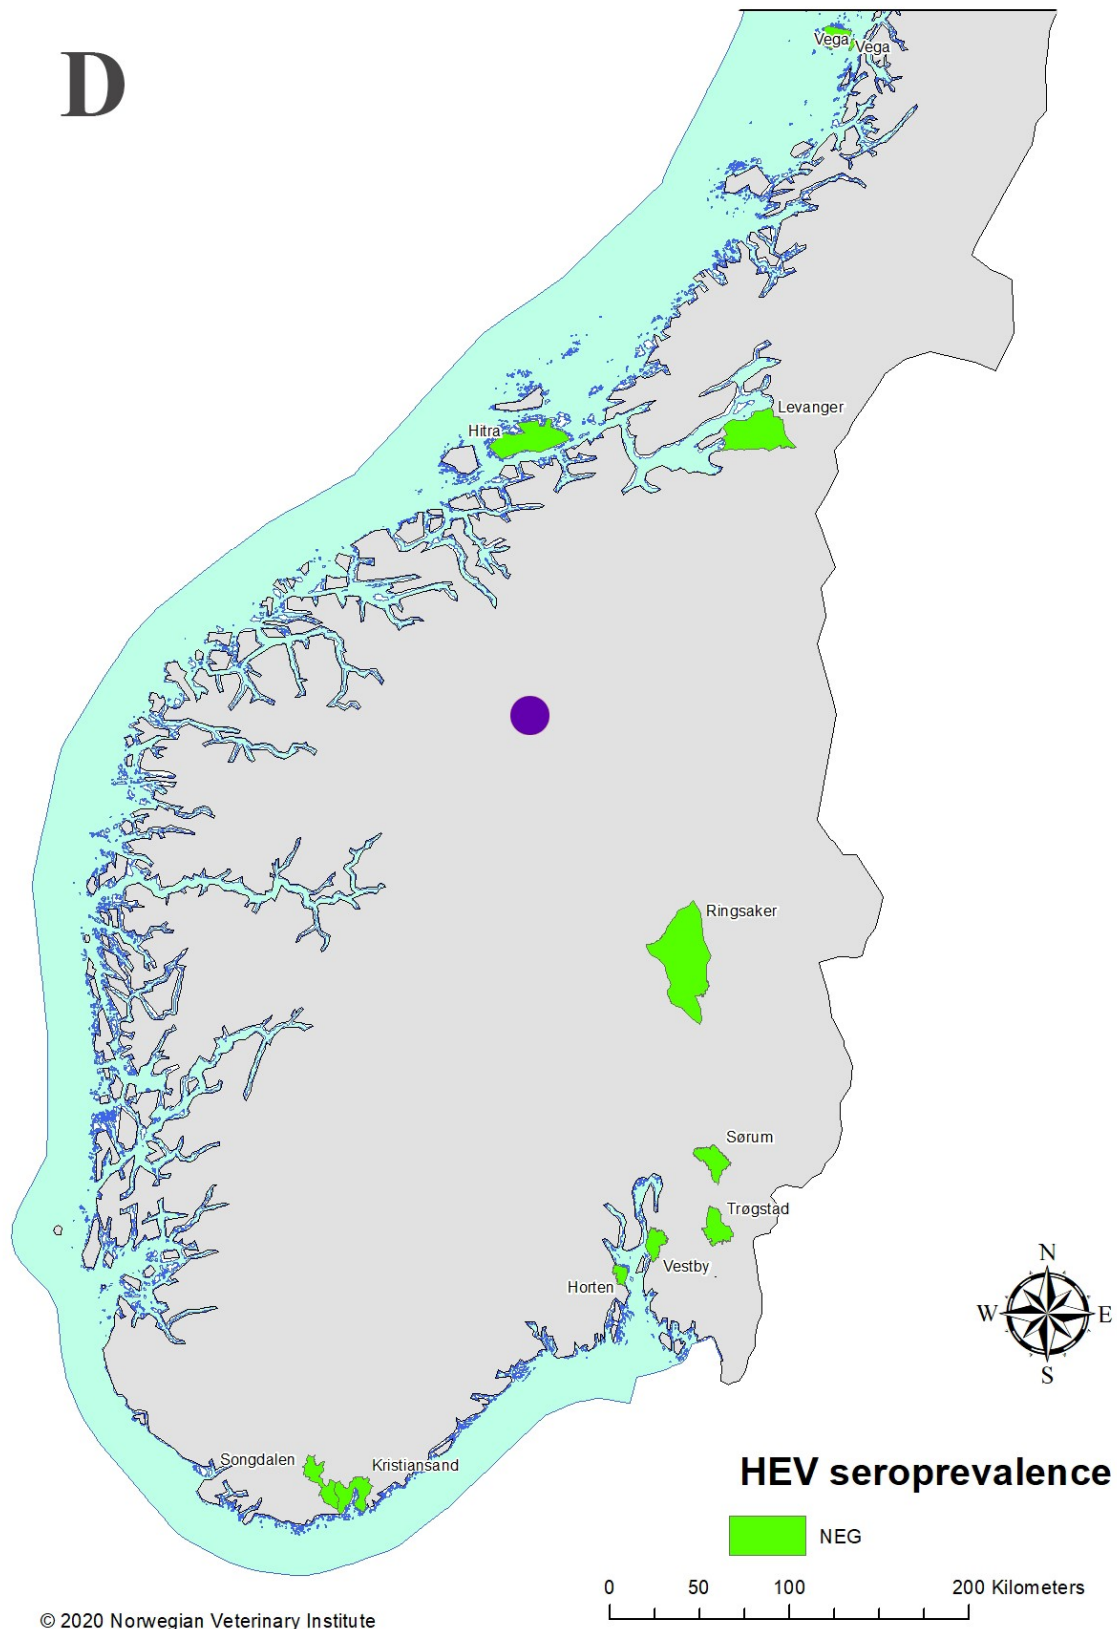

**Figure S1.** (A) Overview of the origin and prevalence results of samples tested for HEV in this study for Eurasian tundra reindeer (*Rangifer tarandus*). The numbers refer to the different wildlife reindeer management districts: 1-Setesdal Rykylke; 2-Setesdal Austhei; 7-Hardangervidda; 8-Norefjell; 9-Oksenhavøya; 11-Nordfjella; 12-Lærdal/Årdal; 13-Vest Jotunheimen; 19-Rondane; 20-Sølnkletten; 23-Knutshø; 24-Raudafjell. All muskoxen (*Ovibos moschatus*) originated from Dovrefjell National

Park, and this area is identified with a purple circle in every map. Note that for some cases the geographical origin was not recorded, therefore the total number of cases does not necessarily coincide with the number of cases represented. **(B)** Overview of the origin and prevalence results of samples tested for HEV in this study for moose (*Alces alces*). Geographic units colored in the map represent municipalities where animal samples were collected. All muskoxen (*Ovibos moschatus*) originated from Dovrefjell National Park, and this area is identified with a purple circle in every map. Note that for some cases the geographical origin was not recorded, therefore the total number of cases does not necessarily coincide with the number of cases represented. **(C)** Overview of the origin and prevalence results of samples tested for HEV in this study for red deer (*Cervus elaphus*). Geographic units colored in the map represent municipalities where animal samples were collected. All muskoxen (*Ovibos moschatus*) originated from Dovrefjell National Park and this area is identified with a purple circle in every map. Note that for some cases the geographical origin was not recorded, therefore the total number of cases does not necessarily coincide with the number of cases represented. **(D)** Overview of the origin and prevalence results of samples tested for HEV in this study for European roe deer (*Capreolus capreolus*). Geographic units colored in the map represent municipalities where animal samples were collected. All muskoxen (*Ovibos moschatus*) originated from Dovrefjell National Park and this area is identified with a purple circle in every map. Note that for some cases the geographical origin was not recorded, therefore the total number of cases does not necessarily coincide with the number of cases represented.
